# Supplementary material for: Mechanistic insights into CO2 hydrogenation to methanol on Cu(110): unveiling energy linear relationships and enhancing performance strategies
Source: Royal Society of Chemistry journal article supplement (doi:10.1039/d4cp01969e), 2024-01-01
Supplement: d4cp01969e1.pdf [file d4cp01969e1.pdf]

*Mechanistic insights into CO<sub>2</sub> hydrogenation to methanol on Cu(110): Unveiling energy linear relationships and enhancing performance strategies*

Huang Qin, Hai Zhang\*, Xingzi Wang, Weidong Fan

*School of Mechanical Engineering, Shanghai Jiao Tong University, Shanghai 200240, China*

---

\* Corresponding author.  
Telephone: 021-34206052  
E-mail: [zhanghai@sjtu.edu.cn](mailto:zhanghai@sjtu.edu.cn)

## 1. Figure captions

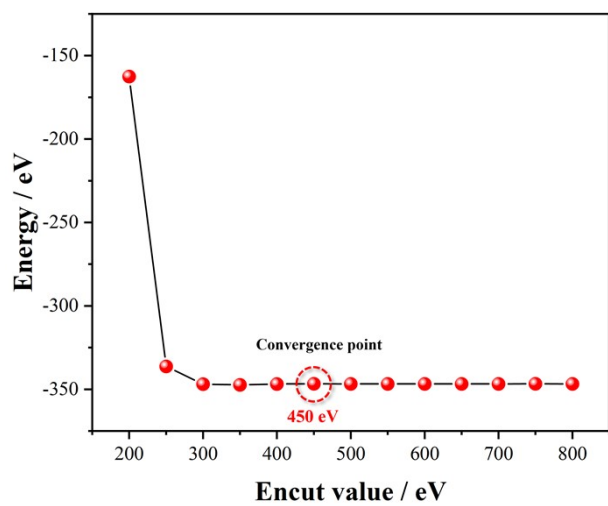

(a) Convergence test on Encut value

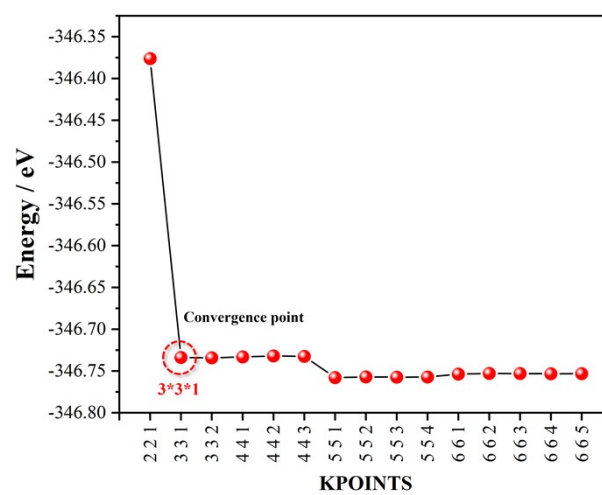

(b) Convergence test on Kpoints

Fig. S1. Convergence tests on calculation parameters, including (a) Encut value and (b) Kpoints.

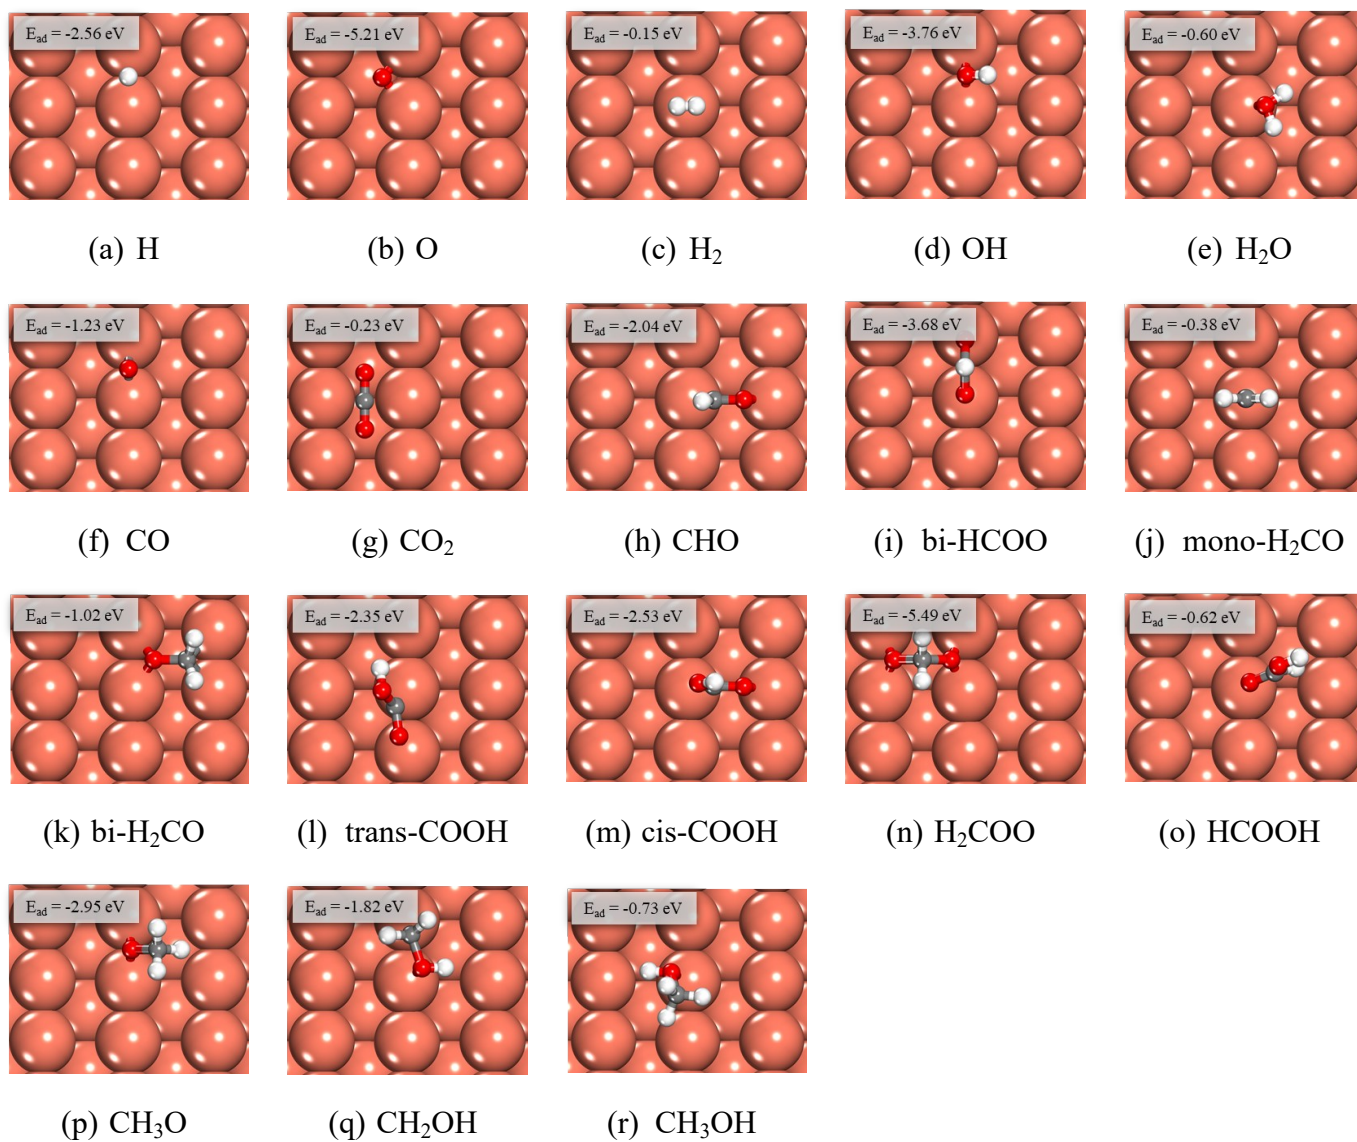

Fig. S2. The most thermodynamically stable configurations of reaction species on Cu(110) involved in CO<sub>2</sub> hydrogenation, labeled with the corresponding adsorption energies (Orange: Cu; Gray: C; Red: O; White: H).

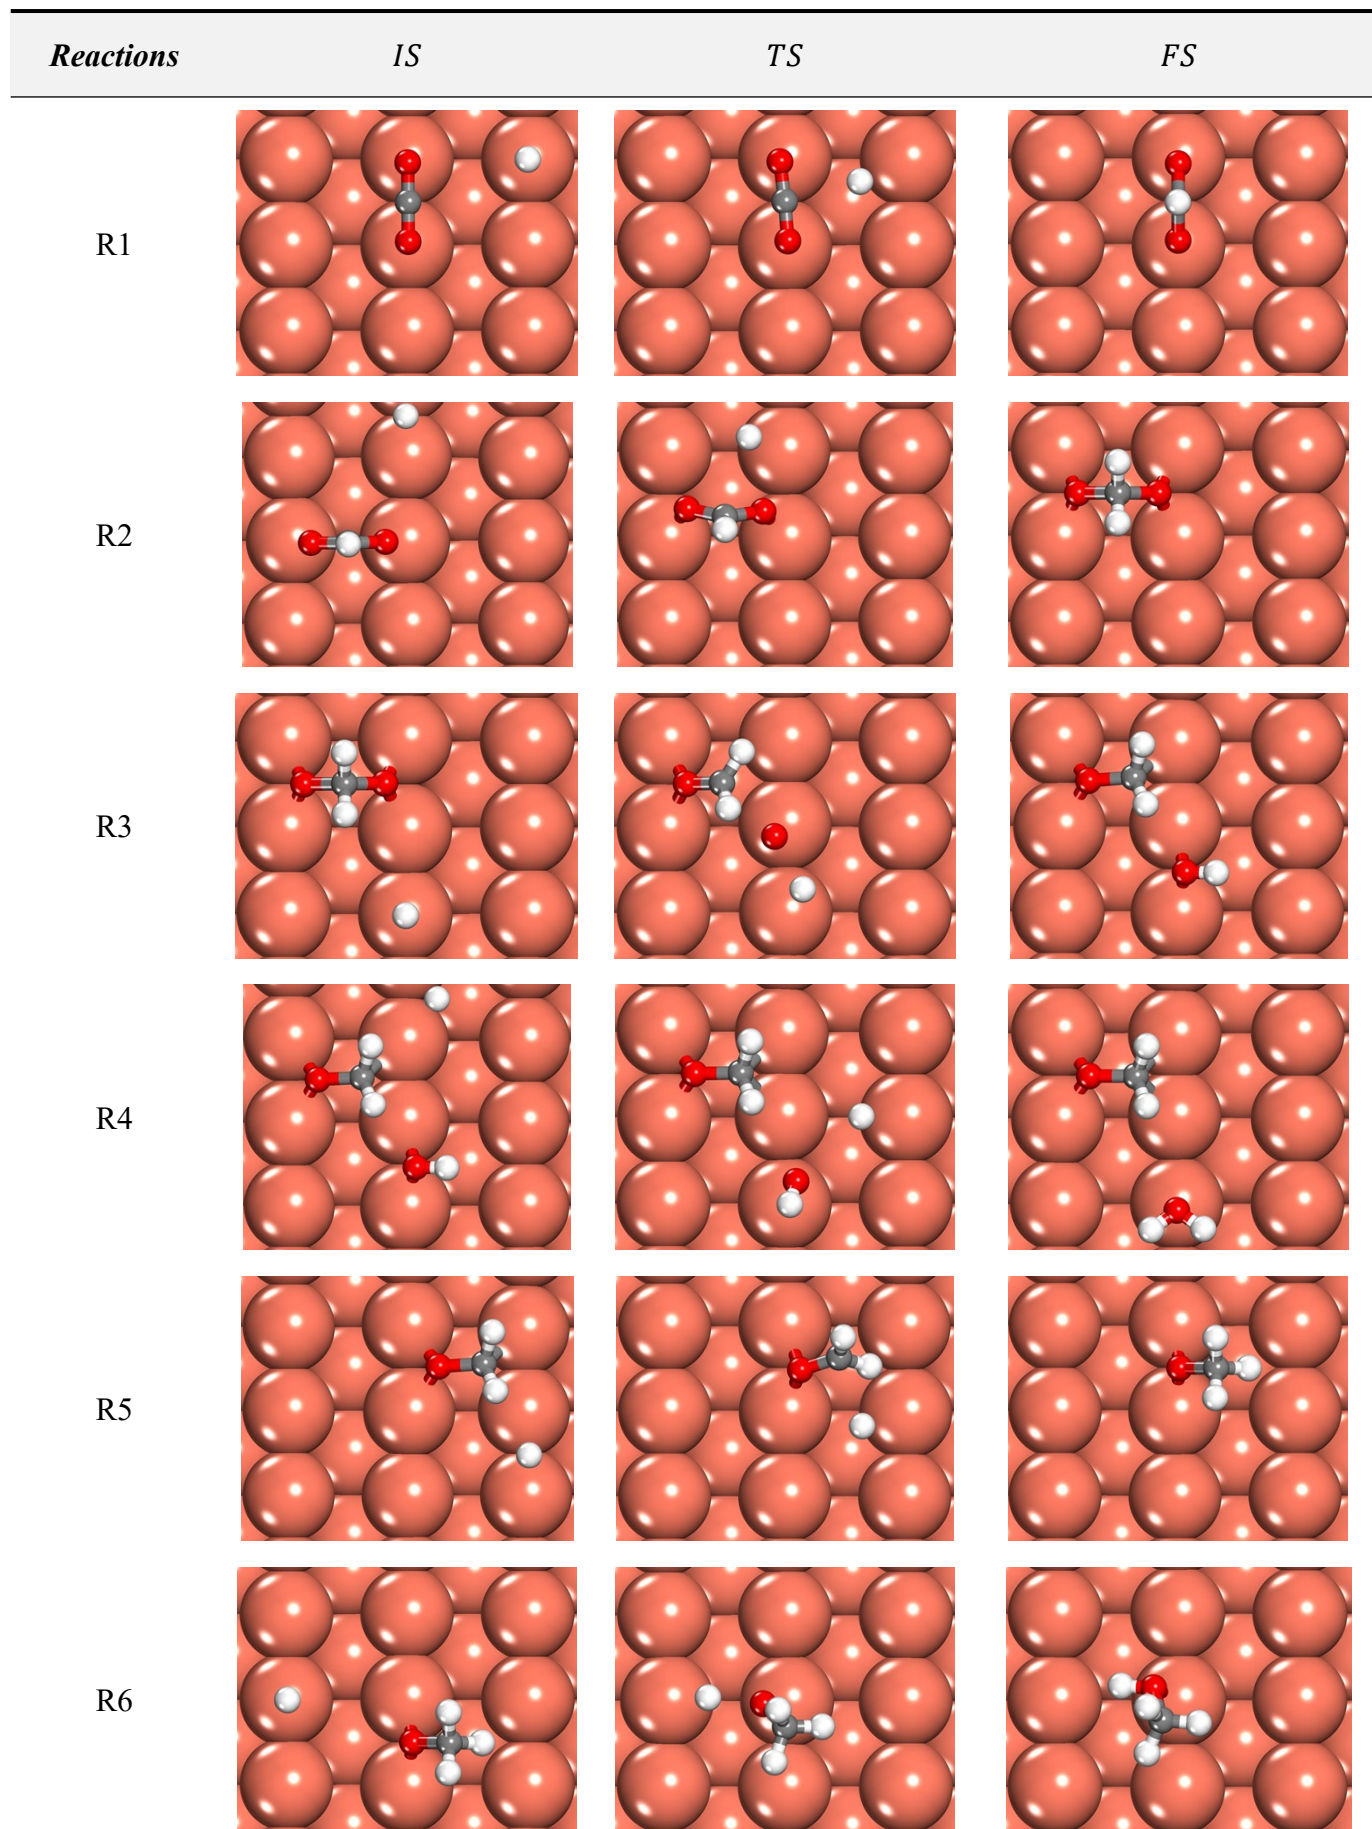

R7

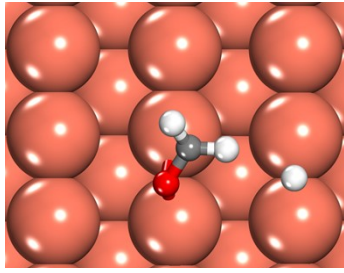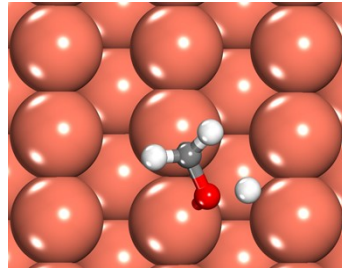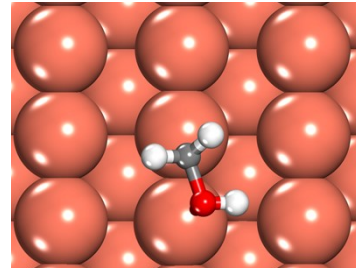

R8

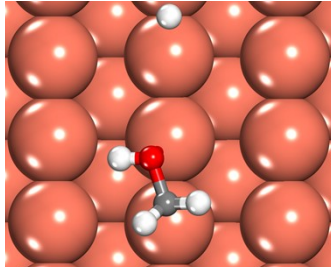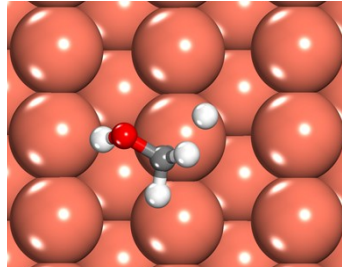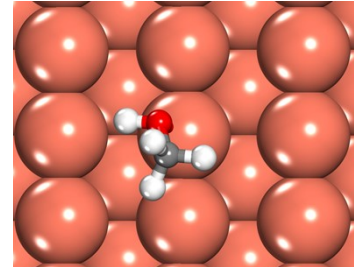

R9

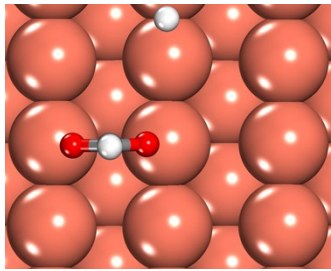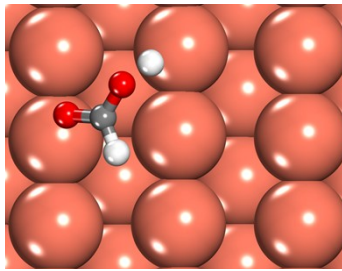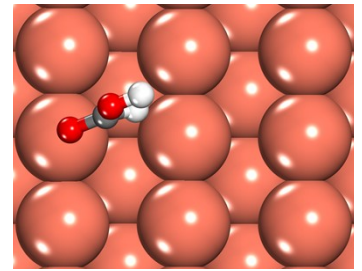

R10

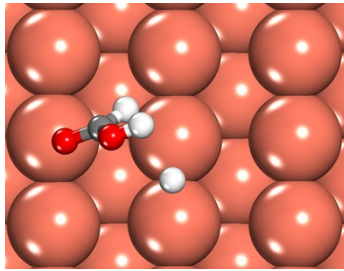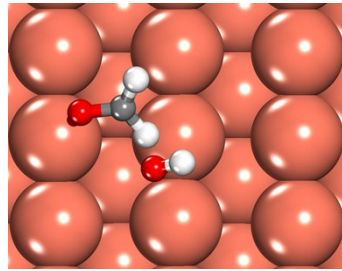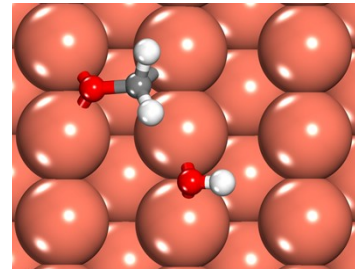

R11

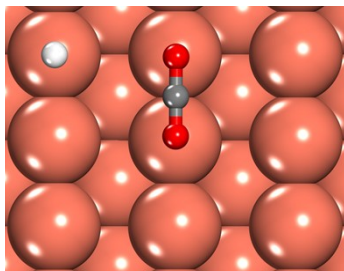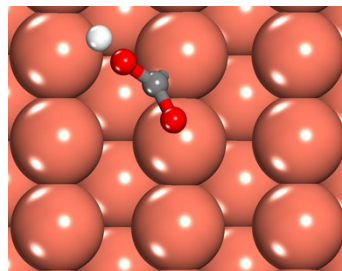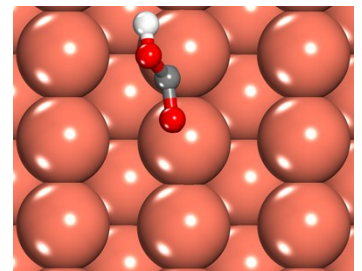

R12

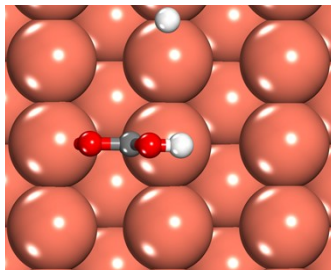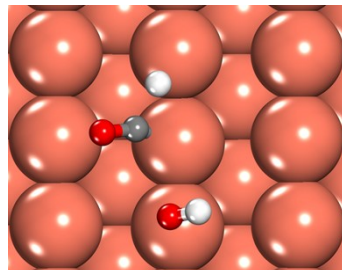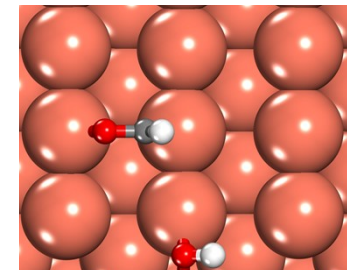

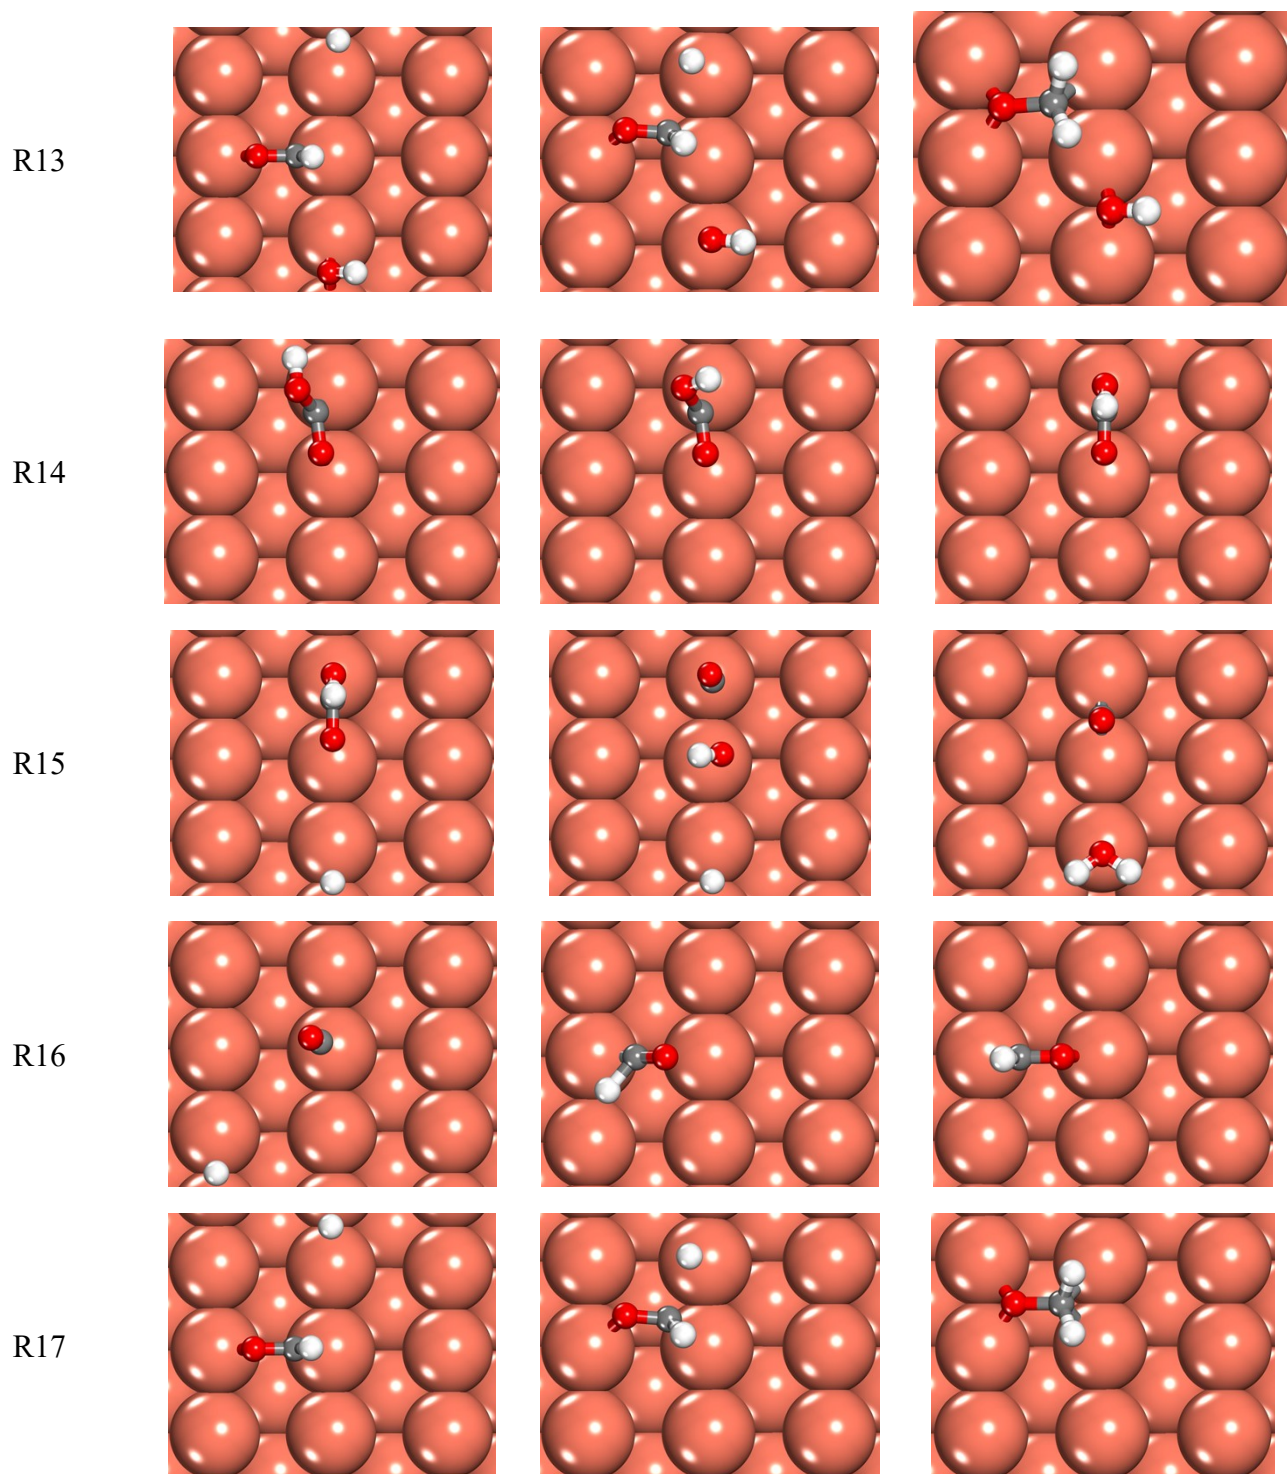

Fig. S3. Schematic diagrams of model structures for all elementary reactions (Orange: Cu; Gray: C; Red: O; White: H), where IS, TS and FS represent initial, transition and final states, respectively.

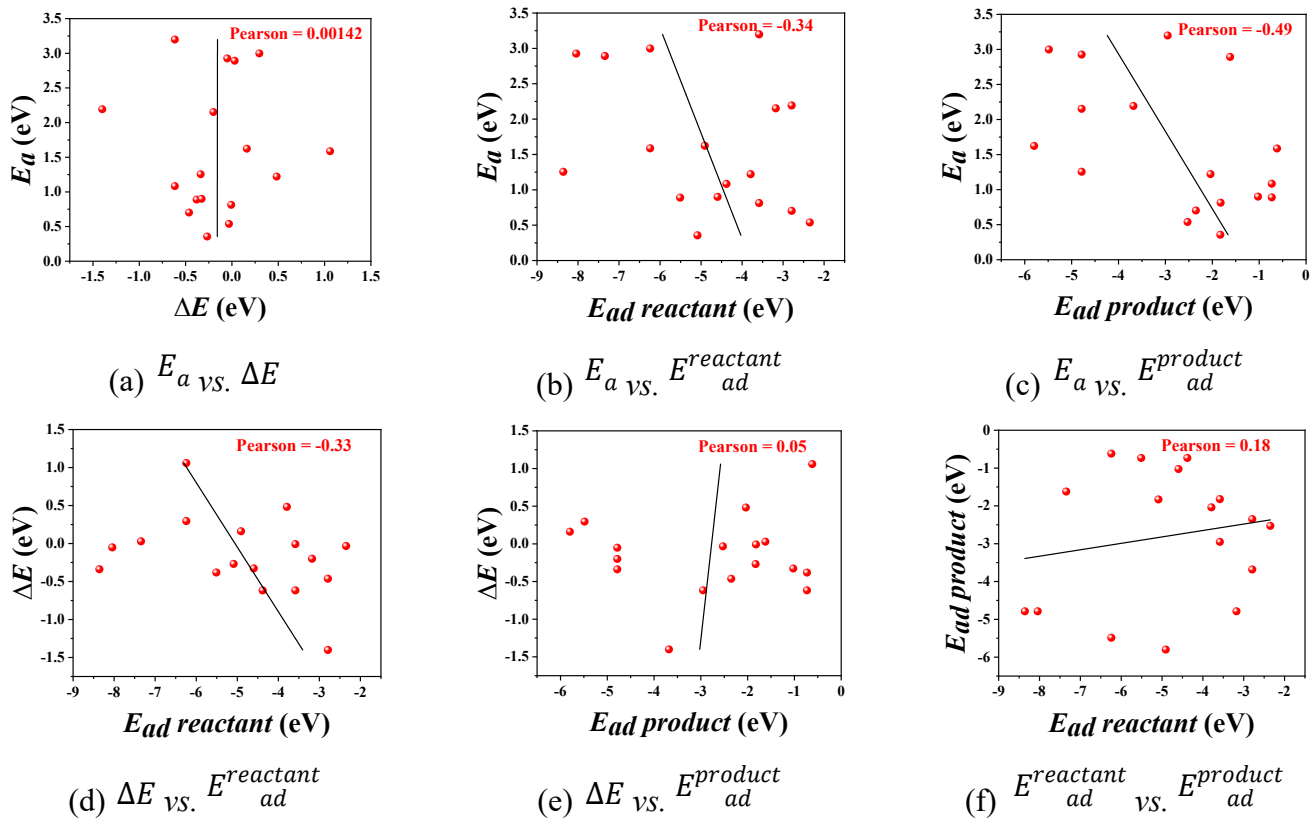

Fig. S4. Correlation diagram of energy-related parameters of hydrogenation reactions on Cu(110) substrate,

where energy parameters include activation energy ( $E_a$ ), reaction energy ( $\Delta E$ ), adsorption energy of reactant (

$E_{ad}^{reactant}$ )

and

product

( $E_{ad}^{product}$ ).

## 2. Table captions

Table S1. Adsorption information of all reaction species on Cu(110) with different pre-sites, where  $t$ ,  $lb$ ,  $sb$  and  $h$  represent top site, long bridge site, short bridge site and hollow site, respectively.

| Species                | Site_ $t$ | Site_ $lb$ | Site_ $sb$ | Site_ $h$ |
|------------------------|-----------|------------|------------|-----------|
| H                      | -2.02     | -2.41      | -2.56      | -2.51     |
| O                      | -5.21     | -5.09      | -4.90      | -5.14     |
| H <sub>2</sub>         | -0.15     | -0.06      | -0.06      | -0.07     |
| OH                     | -3.76     | -3.44      | -3.76      | -3.76     |
| H <sub>2</sub> O       | -0.55     | -0.60      | -0.48      | -0.51     |
| CO                     | -1.15     | -0.82      | -1.23      | -1.23     |
| CO <sub>2</sub>        | -0.19     | -0.23      | -0.20      | -0.23     |
| CHO                    | -1.75     | -2.04      | -1.81      | -1.52     |
| bi-HCOO                | -2.81     | -3.65      | -3.68      | -3.56     |
| mono-H <sub>2</sub> CO | -0.38     | -0.17      | -0.28      | -1.02     |
| bi-H <sub>2</sub> CO   | -0.78     | -1.02      | -0.78      | -1.02     |
| trans-COOH             | -2.06     | -2.35      | -2.14      | -2.35     |
| cis-COOH               | -2.15     | -2.53      | -2.22      | -2.53     |
| H <sub>2</sub> COO     | -4.32     | -5.49      | -4.18      | -5.49     |
| HCOOH                  | -0.50     | -0.61      | -0.26      | -0.62     |
| CH <sub>3</sub> O      | -2.95     | -2.57      | -2.95      | -2.95     |
| CH <sub>2</sub> OH     | -1.82     | -1.72      | -1.82      | -1.76     |
| CH <sub>3</sub> OH     | -0.59     | -0.73      | -0.71      | -0.71     |



Table S2. Information summary of description eigenvalues for linear correlation analysis.

| <i>Reaction</i> | $E_a$ | $\Delta E$ | $E_{ad}^{reactant}$ | $E_{ad}^{product}$ | <i>Atom number</i> | <i>Molar mass</i> | <i>valence electron count</i> | <i>Electronegativity</i> | <i>Electron affinity</i> |
|-----------------|-------|------------|---------------------|--------------------|--------------------|-------------------|-------------------------------|--------------------------|--------------------------|
| R1              | 2.19  | -1.40      | -2.79               | -3.68              | 4                  | 45.02             | 17                            | 11.63                    | 508.70                   |
| R2              | 3.00  | 0.30       | -6.24               | -5.49              | 5                  | 46.03             | 18                            | 13.83                    | 581.50                   |
| R3              | 2.93  | -0.05      | -8.04               | -4.79              | 6                  | 47.03             | 19                            | 16.03                    | 654.30                   |
| R4              | 2.89  | 0.03       | -7.35               | -1.62              | 7                  | 48.04             | 20                            | 18.23                    | 727.10                   |
| R5              | 3.20  | -0.62      | -3.58               | -2.95              | 5                  | 31.03             | 13                            | 12.59                    | 513.30                   |
| R6              | 0.89  | -0.38      | -5.51               | -0.73              | 6                  | 32.04             | 14                            | 14.79                    | 586.10                   |
| R7              | 0.81  | -0.01      | -3.58               | -1.82              | 5                  | 31.03             | 13                            | 12.59                    | 513.30                   |
| R8              | 1.08  | -0.62      | -4.38               | -0.73              | 6                  | 32.04             | 14                            | 14.79                    | 586.10                   |
| R9              | 1.59  | 1.06       | -6.24               | -0.62              | 5                  | 46.03             | 18                            | 13.83                    | 581.50                   |
| R10             | 2.15  | -0.20      | -3.18               | -4.79              | 6                  | 47.03             | 19                            | 16.03                    | 654.30                   |
| R11             | 0.70  | -0.46      | -2.79               | -2.35              | 4                  | 45.02             | 17                            | 11.63                    | 508.70                   |
| R12             | 1.62  | 0.16       | -4.91               | -5.80              | 5                  | 46.03             | 18                            | 13.83                    | 581.50                   |
| R13             | 1.26  | -0.34      | -8.36               | -4.79              | 6                  | 47.03             | 19                            | 16.03                    | 654.30                   |
| R14             | 0.54  | -0.03      | -2.35               | -2.53              | 4                  | 45.02             | 17                            | 11.63                    | 508.70                   |
| R15             | 0.36  | -0.27      | -5.09               | -1.83              | 5                  | 46.03             | 18                            | 13.83                    | 581.50                   |
| R16             | 1.22  | 0.48       | -3.79               | -2.04              | 3                  | 29.02             | 11                            | 8.19                     | 367.70                   |
| R17             | 0.90  | -0.33      | -4.60               | -1.02              | 4                  | 30.03             | 12                            | 10.39                    | 440.50                   |

Continue

| <i>First ionization energy</i> | <i>Reactant charge</i> | <i>Product charge</i> | <i>Reactant – product charge</i> | <i>Reactant fermi level</i> | <i>Product fermi level</i> |
|--------------------------------|------------------------|-----------------------|----------------------------------|-----------------------------|----------------------------|
| 5026.30                        | 2.32                   | 2.11                  | 0.20                             | -0.34                       | -0.13                      |
| 6338.30                        | 2.66                   | 2.53                  | 0.13                             | -0.36                       | -0.11                      |
| 7650.30                        | 3.07                   | 2.46                  | 0.62                             | -0.34                       | -0.32                      |
| 8962.30                        | 3.00                   | 2.50                  | 0.50                             | -0.55                       | -0.26                      |
| 6336.40                        | 2.21                   | 2.01                  | 0.20                             | -0.35                       | -0.13                      |
| 7648.40                        | 2.56                   | 2.02                  | 0.53                             | -0.36                       | -0.02                      |
| 6336.40                        | 2.21                   | 1.76                  | 0.45                             | -0.35                       | -0.11                      |
| 7648.40                        | 2.31                   | 2.02                  | 0.28                             | -0.34                       | -0.02                      |
| 6338.30                        | 2.66                   | 1.87                  | 0.78                             | -0.36                       | 0.02                       |
| 7650.30                        | 2.41                   | 2.46                  | -0.04                            | -0.21                       | -0.32                      |
| 5026.30                        | 2.32                   | 1.83                  | 0.48                             | -0.34                       | -0.15                      |
| 6338.30                        | 2.38                   | 2.27                  | 0.10                             | -0.38                       | -0.33                      |
| 7650.30                        | 2.82                   | 2.46                  | 0.36                             | -0.56                       | -0.32                      |
| 5026.30                        | 1.83                   | 1.95                  | -0.11                            | -0.15                       | -0.09                      |
| 6338.30                        | 2.49                   | 1.91                  | 0.58                             | -0.32                       | -0.31                      |
| 3712.40                        | 1.62                   | 1.48                  | 0.14                             | -0.40                       | -0.13                      |
| 5024.40                        | 2.03                   | 1.67                  | 0.36                             | -0.36                       | -0.12                      |

Continue

| <i>Reactant – product fermi level</i> | <i>Reactant IPDOS</i> | <i>Product IPDOS</i> | <i>Reactant – product IPDOS</i> | <i>Reaction deformation</i> |
|---------------------------------------|-----------------------|----------------------|---------------------------------|-----------------------------|
| -0.25                                 | -8.16                 | -7.87                | -0.29                           | 5.14                        |
| -0.02                                 | -8.24                 | -8.60                | 0.36                            | 7.47                        |
| -0.29                                 | -8.96                 | -9.11                | 0.14                            | 4.74                        |
| -0.23                                 | -5.66                 | -5.50                | -0.16                           | 5.50                        |
| -0.33                                 | -5.87                 | -6.20                | 0.33                            | 6.76                        |
| -0.24                                 | -5.66                 | -5.79                | 0.13                            | 3.89                        |
| -0.32                                 | -6.16                 | -6.20                | 0.04                            | 6.85                        |
| -0.38                                 | -8.16                 | -8.46                | 0.30                            | 6.18                        |
| 0.11                                  | -8.83                 | -8.60                | -0.24                           | 7.58                        |
| -0.19                                 | -8.51                 | -7.88                | -0.63                           | 3.50                        |
| -0.05                                 | -8.25                 | -8.37                | 0.13                            | 6.48                        |
| -0.24                                 | -8.74                 | -8.60                | -0.15                           | 5.44                        |
| -0.07                                 | -7.88                 | -7.89                | 0.02                            | 2.54                        |
| 0.00                                  | -8.26                 | -8.73                | 0.47                            | 6.53                        |
| -0.27                                 | -5.29                 | -5.08                | -0.21                           | 5.52                        |
| -0.24                                 | -5.44                 | -5.30                | -0.15                           | 3.95                        |
| -0.25                                 | -8.16                 | -7.87                | -0.29                           | 5.14                        |

Table S3. Chemical formulas of seven-dimensional SISSO variables and their correlation parameters, labelled

with the activation energies of all elementary reactions involved in hydrogenation process.

| <i>SISSO</i> | <i>Formula</i>                                                                                              | <i>PCC</i> |
|--------------|-------------------------------------------------------------------------------------------------------------|------------|
| $SISSO_1^1$  | $2 * \square\square\square\square\square\square\square\square\square\square\square + \square\square\square$ | 0.71       |
| $SISSO_2^1$  | $Chg_{Product} * (Chg_{Product}/IPDOS_{Product})$                                                           | -0.71      |
| $SISSO_2^2$  | $(AN/Fermi_{Product})/Derform$                                                                              | 0.20       |
| $SISSO_3^1$  | $Chg_{Product} * (Chg_{Product}/IPDOS_{Product})$                                                           | -0.71      |
| $SISSO_3^2$  | $(AN/Fermi_{Product})/Derform$                                                                              | 0.20       |
| $SISSO_3^3$  | $MM/(E_{ad}^{product} - IPDOS_{Product})$                                                                   | 0.15       |
| $SISSO_4^1$  | $Chg_{Product} * (Chg_{Product}/IPDOS_{Product})$                                                           | -0.71      |
| $SISSO_4^2$  | $(AN/Fermi_{Product})/Derform$                                                                              | 0.20       |
| $SISSO_4^3$  | $Fermi_{Reactant - Product}/(E_{ad}^{product} - IPDOS_{Product})$                                           | 0.15       |
| $SISSO_4^4$  | $(Fermi_{Product} * Fermi_{Reactant - Product})/FIE$                                                        | 0.06       |
| $SISSO_5^1$  | $AN * Chg_{Product} - EN$                                                                                   | 0.71       |
| $SISSO_5^2$  | $(MM * Chg_{Product})/IPDOS_{Product}$                                                                      | -0.69      |
| $SISSO_5^3$  | $Fermi_{Reactant} * (E_{ad}^{product} + Derform)$                                                           | 0.14       |
| $SISSO_5^4$  | $E_{ad}^{product} * (IPDOS_{Product} + Derform)$                                                            | 0.09       |
| $SISSO_5^5$  | $Chg_{Product} + E_{ad}^{product} + Derform$                                                                | -0.10      |
| $SISSO_6^1$  | $AN * Chg_{Product} - EN$                                                                                   | 0.71       |
| $SISSO_6^2$  | $(MM * Chg_{Product})/IPDOS_{Product}$                                                                      | -0.69      |
| $SISSO_6^3$  | $Fermi_{Reactant} * (E_{ad}^{product} + Derform)$                                                           | 0.14       |
| $SISSO_6^4$  | $E_{ad}^{product} * (IPDOS_{Product} + Derform)$                                                            | 0.09       |
| $SISSO_6^5$  | $Chg_{Product} + E_{ad}^{product} + Derform$                                                                | -0.10      |
| $SISSO_6^6$  | $Chg_{Product}/(Derform - AN)$                                                                              | 0.41       |
| $SISSO_7^1$  | $AN * Chg_{Product} - EN$                                                                                   | 0.71       |
| $SISSO_7^2$  | $(AN/Fermi_{Product})/Derform$                                                                              | 0.20       |
| $SISSO_7^3$  | $Fermi_{Reactant - Product}/(E_{ad}^{reactant} - IPDOS_{Product})$                                          | 0.15       |

|             |                                                                           |       |
|-------------|---------------------------------------------------------------------------|-------|
| $SISSO_7^4$ | $(IPDOS_{Reactant - Product}/E_{ad}^{reactant})/Chg_{Reactant - Product}$ | 0.01  |
| $SISSO_7^5$ | $(E_{ad}^{product} + Derform)/EN$                                         | -0.27 |
| $SISSO_7^6$ | $VEC/(AN + IPDOS_{Reactant})$                                             | -0.11 |
| $SISSO_7^7$ | $IPDOS_{Product}/(AN + IPDOS_{Reactant})$                                 | 0.11  |

---

Table S4. Chemical formulas of seven-dimensional SISO variables and their correlation parameters, labelled

with the reaction energies of all elementary reactions involved in hydrogenation process.

| <i>SISO</i> | <i>Formula</i>                                                                         | <i>PCC</i> |
|-------------|----------------------------------------------------------------------------------------|------------|
| $SISO_1^1$  | $IPDOS_{Reactant - Product} * (IPDOS_{Reactant - Product} / Fermi_{Product})$          | 0.72       |
| $SISO_2^1$  | $(Chg_{Reactant - Product} - IPDOS_{Reactant - Product}) / Fermi_{Product}$            | 0.71       |
| $SISO_2^2$  | $IPDOS_{Reactant} / (E_{ad}^{product} + AN)$                                           | 0.57       |
| $SISO_3^1$  | $(Chg_{Reactant - Product} - IPDOS_{Reactant - Product}) / Fermi_{Product}$            | 0.71       |
| $SISO_3^2$  | $IPDOS_{Reactant} / (E_{ad}^{product} + AN)$                                           | 0.57       |
| $SISO_3^3$  | $IPDOS_{Reactant - Product} / (IPDOS_{Reactant} + Derform)$                            | -0.53      |
| $SISO_4^1$  | $(Chg_{Reactant - Product} - IPDOS_{Reactant - Product}) / Fermi_{Product}$            | 0.71       |
| $SISO_4^2$  | $Fermi_{Reactant - Product} / (Chg_{Reactant - Product} + IPDOS_{Reactant - Product})$ | 0.33       |
| $SISO_4^3$  | $Chg_{Product} / (E_{ad}^{product} + AN)$                                              | -0.56      |
| $SISO_4^4$  | $IPDOS_{Reactant} / (E_{ad}^{product} + AN)$                                           | 0.57       |
| $SISO_5^1$  | $(Chg_{Reactant - Product} - IPDOS_{Reactant - Product}) / Fermi_{Product}$            | 0.71       |
| $SISO_5^2$  | $Chg_{Product} / (E_{ad}^{product} + AN)$                                              | -0.56      |
| $SISO_5^3$  | $IPDOS_{Reactant} / (E_{ad}^{product} + AN)$                                           | 0.57       |
| $SISO_5^4$  | $Fermi_{Reactant} / (Chg_{Reactant - Product} + IPDOS_{Reactant - Product})$           | 0.30       |
| $SISO_5^5$  | $Fermi_{Reactant - Product} + Fermi_{Reactant} / E_{ad}^{product}$                     | 0.22       |
| $SISO_6^1$  | $(Chg_{Reactant - Product} - IPDOS_{Reactant - Product}) / Fermi_{Product}$            | 0.71       |
| $SISO_6^2$  | $E_{ad}^{reactant} / (Chg_{Reactant - Product} + IPDOS_{Reactant - Product})$          | 0.32       |
| $SISO_6^3$  | $Chg_{Product} / (E_{ad}^{product} + AN)$                                              | -0.56      |
| $SISO_6^4$  | $IPDOS_{Reactant} / (E_{ad}^{product} + AN)$                                           | 0.57       |
| $SISO_6^5$  | $Fermi_{Reactant - Product} + Fermi_{Reactant} / E_{ad}^{product}$                     | 0.22       |
| $SISO_6^6$  | $FIE / (Fermi_{Product} - Fermi_{Reactant - Product})$                                 | -0.06      |
| $SISO_7^1$  | $Chg_{Reactant - Product} - IPDOS_{Reactant - Product} / Fermi_{Product}$              | 0.71       |
| $SISO_7^2$  | $E_{ad}^{reactant} / (Chg_{Reactant - Product} + IPDOS_{Reactant - Product})$          | 0.32       |
| $SISO_7^3$  | $Chg_{Product} / (E_{ad}^{product} + AN)$                                              | -0.56      |

|             |                                                                                                       |      |
|-------------|-------------------------------------------------------------------------------------------------------|------|
| $SISSO_7^4$ | $IPDOS_{\text{Reactant}}/(E_{\text{ad}}^{\text{product}} + AN)$                                       | 0.57 |
| $SISSO_7^5$ | $Fermi_{\text{Reactant} - \text{Product}} + Fermi_{\text{Reactant}}/E_{\text{ad}}^{\text{product}}$   | 0.22 |
| $SISSO_7^6$ | $E_{\text{ad}}^{\text{reactant}}/(Fermi_{\text{Product}} - Fermi_{\text{Reactant} - \text{Product}})$ | 0.02 |
| $SISSO_7^7$ | $IPDOS_{\text{Reactant} - \text{Product}} + EN/E_{\text{ad}}^{\text{reactant}}$                       | 0.49 |

---

Table S5. Chemical formulas of seven-dimensional SISO variables and their respective correlation parameters, labelled with the activation energies of elementary reactions with hydrogen attacking carbon atom.

| <i>SISO</i> | <i>Formula</i>                                                    | <i>PCC</i> | <i>RMSE</i> |
|-------------|-------------------------------------------------------------------|------------|-------------|
| $SISO_1^1$  | $IPDOS_{Product}/E_{ad}^{product} - EN$                           | -0.96      | 10.86       |
| $SISO_2^1$  | $IPDOS_{Product}/E_{ad}^{product} - EN$                           | -0.96      | 10.86       |
| $SISO_2^2$  | $Fermi_{Product}/(VEC - EN)$                                      | -0.56      | 2.24        |
| $SISO_3^1$  | $IPDOS_{Product}/E_{ad}^{product} - EN$                           | -0.96      | 10.86       |
| $SISO_3^2$  | $Fermi_{Product}/(VEC - EN)$                                      | -0.56      | 2.24        |
| $SISO_3^3$  | $(Chg_{Product} + Derform)/EA$                                    | -0.27      | 2.13        |
| $SISO_4^1$  | $(E_{ad}^{product} - AN)/Chg_{Product}$                           | -0.95      | 5.66        |
| $SISO_4^2$  | $Fermi_{Reactant - Product} + Derform/MM$                         | 0.18       | 2.22        |
| $SISO_4^3$  | $Chg_{Reactant - Product} + AN/Derform$                           | -0.06      | 1.30        |
| $SISO_4^4$  | $IPDOS_{Reactant - Product}/(E_{ad}^{product} + Fermi_{Product})$ | 0.04       | 2.07        |
| $SISO_5^1$  | $IPDOS_{Reactant}/(E_{ad}^{product} - EN)$                        | -0.96      | 10.79       |
| $SISO_5^2$  | $(E_{ad}^{product} * FIE)/MM$                                     | -0.96      | 455.04      |
| $SISO_5^3$  | $VEC/(IPDOS_{Product} + Derform)$                                 | -0.62      | 3205.35     |
| $SISO_5^4$  | $EN/(Chg_{Reactant - Product} - Derform)$                         | -0.21      | 4.40        |
| $SISO_5^5$  | $Chg_{Product}/(IPDOS_{Reactant - Product} - Chg_{Reactant})$     | -0.13      | 2.90        |
| $SISO_6^1$  | $IPDOS_{Product}/E_{ad}^{product} - EN$                           | -0.96      | 10.86       |
| $SISO_6^2$  | $Fermi_{Reactant} * (E_{ad}^{product} + VEC)$                     | 0.01       | 6.14        |
| $SISO_6^3$  | $Derform * (Fermi_{Reactant} + Fermi_{Product})$                  | -0.25      | 4.57        |
| $SISO_6^4$  | $(MM * IPDOS_{Reactant - Product})/E_{ad}^{product}$              | 0.11       | 3.38        |
| $SISO_6^5$  | $MM/(Fermi_{Reactant} - IPDOS_{Reactant})$                        | 0.12       | 3.94        |
| $SISO_6^6$  | $(FIE * IPDOS_{Reactant})/E_{ad}^{reactant}$                      | 0.35       | 9841.01     |
| $SISO_7^1$  | $IPDOS_{Product}/E_{ad}^{product} - EN$                           | -0.96      | 10.86       |
| $SISO_7^2$  | $(E_{ad}^{product} * FIE)/MM$                                     | -0.96      | 455.04      |
| $SISO_7^3$  | $Fermi_{Reactant - Product} + Derform/MM$                         | 0.18       | 2.22        |



|             |                                                      |       |         |
|-------------|------------------------------------------------------|-------|---------|
| $SISSO_7^4$ | $Derform/EN - Chg_{Reactant - Product}$              | 0.10  | 1.92    |
| $SISSO_7^5$ | $(MM * IPDOS_{Reactant - Product})/E_{ad}^{product}$ | 0.11  | 3.38    |
| $SISSO_7^6$ | $(FIE * IPDOS_{Product})/E_{ad}^{reactant}$          | 0.34  | 9403.61 |
| $SISSO_7^7$ | $E_{ad}^{product}$                                   | -0.82 | 5.20    |

---

Table S6. Chemical formulas of seven-dimensional SISO variables and their respective correlation parameters, labelled with the reaction energies of elementary reactions with hydrogen attacking carbon atom.

| <i>SISO</i> | <i>Formula</i>                                                 | <i>PCC</i> | <i>RMSE</i> |
|-------------|----------------------------------------------------------------|------------|-------------|
| $SISO_1^1$  | $Chg_{Product}/E_{ad}^{reactant} - Chg_{Reactant - Product}$   | 0.99       | 0.59        |
| $SISO_2^1$  | $Chg_{Product}/E_{ad}^{reactant} - Chg_{Reactant - Product}$   | 0.99       | 0.59        |
| $SISO_2^2$  | $Derform/IPDOS_{Product} - Chg_{Reactant}$                     | 0.25       | 2.78        |
| $SISO_3^1$  | $Chg_{Product}/E_{ad}^{reactant} - Chg_{Reactant - Product}$   | 0.99       | 0.59        |
| $SISO_3^2$  | $Derform/IPDOS_{Product} - Chg_{Reactant}$                     | 0.25       | 2.78        |
| $SISO_3^3$  | $E_{ad}^{product}/(VEC - EN)$                                  | 0.08       | 2.90        |
| $SISO_4^1$  | $Chg_{Reactant}/E_{ad}^{reactant} - Chg_{Reactant - Product}$  | 0.98       | 0.61        |
| $SISO_4^2$  | $E_{ad}^{reactant}/IPDOS_{Product} - Chg_{Reactant - Product}$ | 0.96       | 0.96        |
| $SISO_4^3$  | $Chg_{Reactant - Product} + EN * Fermi_{Reactant}$             | 0.08       | 3.76        |
| $SISO_4^4$  | $Fermi_{Reactant}/(VEC - EN)$                                  | -0.01      | 0.76        |
| $SISO_5^1$  | $Chg_{Reactant}/E_{ad}^{reactant} - Chg_{Reactant - Product}$  | 0.98       | 0.61        |
| $SISO_5^2$  | $Chg_{Product}/(VEC - EN)$                                     | -0.01      | 2.56        |
| $SISO_5^3$  | $MM/(IPDOS_{Product} + Derform)$                               | 0.18       | 7648.54     |
| $SISO_5^4$  | $Chg_{Reactant}/(IPDOS_{Product} - Derform)$                   | 0.02       | 0.65        |
| $SISO_5^5$  | $(Fermi_{Reactant} * IPDOS_{Reactant})/Derform$                | 0.05       | 1.02        |
| $SISO_6^1$  | $Chg_{Product}/E_{ad}^{reactant} - Chg_{Reactant - Product}$   | 0.99       | 0.59        |
| $SISO_6^2$  | $E_{ad}^{reactant}/(Chg_{Reactant} + Fermi_{Reactant})$        | -0.94      | 2.32        |
| $SISO_6^3$  | $E_{ad}^{product}/AN - AN$                                     | 0.22       | 4.85        |
| $SISO_6^4$  | $VEC/(IPDOS_{Product} + Derform)$                              | -0.18      | 1396.36     |
| $SISO_6^5$  | $FIE/Derform - EA$                                             | 0.04       | 584.00      |
| $SISO_6^6$  | $AN - Derform - Chg_{Reactant}$                                | 0.06       | 2.92        |
| $SISO_7^1$  | $Chg_{Product}/E_{ad}^{reactant} - Chg_{Reactant - Product}$   | 0.99       | 0.59        |
| $SISO_7^2$  | $(EA/E_{ad}^{reactant})/Fermi_{Reactant}$                      | -0.94      | 364.99      |
| $SISO_7^3$  | $Chg_{Product} * AN * EN$                                      | -0.16      | 125.95      |

|             |                              |       |      |
|-------------|------------------------------|-------|------|
| $SISSO_7^4$ | $Fermi_{Product}/(VEC - EN)$ | 0.09  | 0.69 |
| $SISSO_7^5$ | $MM/Derform - Chg_{Product}$ | 0.00  | 5.31 |
| $SISSO_7^6$ | $E_{ad}^{product}$           | -0.10 | 2.91 |
| $SISSO_7^7$ | $E_{ad}^{product}$           | -0.10 | 2.91 |

---

Table S7. Chemical formulas of seven-dimensional SISSO variables and their respective correlation parameters, labelled with the activation energies of elementary reactions with hydrogen attacking oxygen atom.

| <i>SISSO</i> | <i>Formula</i>                                                                         | <i>PCC</i> | <i>RMSE</i> |
|--------------|----------------------------------------------------------------------------------------|------------|-------------|
| $SISSO_1^1$  | $(Derform/E_{ad}^{reactant})/Chg_{Reactant - Product}$                                 | 1.00       | 3.14        |
| $SISSO_2^1$  | $VEC/EA - Fermi_{Reactant}$                                                            | 1.00       | 0.70        |
| $SISSO_2^2$  | $(VEC - EN)/Fermi_{Product}$                                                           | 1.00       | 136.28      |
| $SISSO_3^1$  | $(Derform/E_{ad}^{reactant})/Chg_{Reactant - Product}$                                 | 1.00       | 3.14        |
| $SISSO_3^2$  | $IPDOS_{Reactant} + Chg_{Product} * IPDOS_{Reactant - Product}$                        | -0.02      | 8.19        |
| $SISSO_3^3$  | $AN/E_{ad}^{reactant} - IPDOS_{Reactant - Product}$                                    | 0.06       | 2.25        |
| $SISSO_4^1$  | $(Derform/E_{ad}^{reactant})/Chg_{Reactant - Product}$                                 | 1.00       | 3.14        |
| $SISSO_4^2$  | $Chg_{Reactant - Product}/E_{ad}^{product} - IPDOS_{Reactant}$                         | 0.03       | 5.60        |
| $SISSO_4^3$  | $Fermi_{Reactant - Product} * IPDOS_{Reactant - Product} - Fermi_{Reactant - Product}$ | -0.01      | 0.82        |
| $SISSO_4^4$  | $Chg_{Product} * Chg_{Reactant - Product} - IPDOS_{Reactant - Product}$                | 0.07       | 0.47        |
| $SISSO_5^1$  | $(Derform/E_{ad}^{reactant})/Chg_{Reactant - Product}$                                 | 1.00       | 3.14        |
| $SISSO_5^2$  | $IPDOS_{Reactant} + Chg_{Product} * IPDOS_{Reactant - Product}$                        | -0.02      | 8.19        |
| $SISSO_5^3$  | $Chg_{Product} * IPDOS_{Product} - E_{ad}^{reactant}$                                  | -0.08      | 9.94        |
| $SISSO_5^4$  | $N/E_{ad}^{reactant} - IPDOS_{Reactant - Product}$                                     | 0.06       | 2.25        |
| $SISSO_5^5$  | $E_{ad}^{reactant}$                                                                    | -0.82      | 5.78        |
| $SISSO_6^1$  | $(Derform/E_{ad}^{reactant})/Chg_{Reactant - Product}$                                 | 1.00       | 3.14        |
| $SISSO_6^2$  | $(IPDOS_{Reactant} - VEC)/IPDOS_{Product}$                                             | -1.00      | 2.23        |
| $SISSO_6^3$  | $IPDOS_{Reactant - Product}/Fermi_{Reactant} - IPDOS_{Product}$                        | 0.02       | 6.29        |
| $SISSO_6^4$  | $IPDOS_{Reactant - Product} + E_{ad}^{reactant}/AN$                                    | 0.02       | 1.92        |
| $SISSO_6^5$  | $Chg_{Product} * (E_{ad}^{reactant} + VEC)$                                            | 0.06       | 19.82       |
| $SISSO_6^6$  | $E_{ad}^{reactant}$                                                                    | -0.82      | 5.78        |
| $SISSO_7^1$  | $(Derform/E_{ad}^{reactant})/Chg_{Reactant - Product}$                                 | 1.00       | 3.14        |
| $SISSO_7^2$  | $(Chg_{Product}/Fermi_{Reactant})/Chg_{Reactant}$                                      | 1.00       | 3.19        |

|             |                                            |       |       |
|-------------|--------------------------------------------|-------|-------|
| $SISSO_7^3$ | $VEC * Fermi_{Product} - AN$               | 1.00  | 7.02  |
| $SISSO_7^4$ | $(Chg_{Product} * IPDOS_{Reactant}) / FIE$ | -0.05 | 1.06  |
| $SISSO_7^5$ | $IPDOS_{Reactant} * (EA - Chg_{Reactant})$ | 0.04  | 17.14 |
| $SISSO_7^6$ | $E_{ad}^{reactant}$                        | -0.82 | 5.78  |
| $SISSO_7^7$ | $E_{ad}^{product}$                         | 0.74  | 2.44  |

---

Table S8. Chemical formulas of seven-dimensional SISO variables and their respective correlation parameters, labelled with the reaction energies of elementary reactions with hydrogen attacking oxygen atom.

| <i>SISO</i> | <i>Formula</i>                                                 | <i>PCC</i> | <i>RMSE</i> |
|-------------|----------------------------------------------------------------|------------|-------------|
| $SISO_1^1$  | $(MM * FIE)/Chg_{Reactant - Product}$                          | -1.00      | 435550.30   |
| $SISO_2^1$  | $(MM * FIE)/Chg_{Reactant - Product}$                          | -1.00      | 435550.30   |
| $SISO_2^2$  | $Fermi_{Product} + AN/Chg_{Reactant}$                          | -0.05      | 2.05        |
| $SISO_3^1$  | $(E_{ad}^{reactant}/Chg_{Product})/Fermi_{Reactant - Product}$ | 1.00       | 8.31        |
| $SISO_3^2$  | $(IPDOS_{Reactant}/Chg_{Product})/AN$                          | -0.05      | 1.08        |
| $SISO_3^3$  | $(VEC/Chg_{Product})/IPDOS_{Product}$                          | 0.14       | 1.37        |
| $SISO_4^1$  | $(MM * FIE)/Chg_{Reactant - Product}$                          | -1.00      | 435550.30   |
| $SISO_4^2$  | $Fermi_{Product} + AN/Chg_{Reactant}$                          | -0.05      | 2.05        |
| $SISO_4^3$  | $Chg_{Product} + Chg_{Product}/IPDOS_{Product}$                | 0.08       | 1.66        |
| $SISO_4^4$  | $(VEC/Chg_{Product})/IPDOS_{Product}$                          | 0.14       | 1.37        |
| $SISO_5^1$  | $(MM * FIE)/Chg_{Reactant - Product}$                          | -1.00      | 435550.30   |
| $SISO_5^2$  | $(Chg_{Reactant} + IPDOS_{Reactant})/VEC$                      | -0.02      | 0.70        |
| $SISO_5^3$  | $(Chg_{Reactant - Product}/IPDOS_{Reactant})/Derform$          | -0.04      | 0.61        |
| $SISO_5^4$  | $AN/MM - Chg_{Product}$                                        | 0.06       | 1.89        |
| $SISO_5^5$  | $Chg_{Reactant} * IPDOS_{Reactant - Product} - Derform$        | -0.05      | 5.14        |
| $SISO_6^1$  | $(MM * FIE)/Chg_{Reactant - Product}$                          | -1.00      | 435550.30   |
| $SISO_6^2$  | $EA/AN - VEC$                                                  | 0.03       | 95.92       |
| $SISO_6^3$  | $(Chg_{Reactant} + IPDOS_{Reactant - Product})/Derform$        | 0.08       | 0.75        |
| $SISO_6^4$  | $Chg_{Product} + Chg_{Product}/IPDOS_{Reactant}$               | 0.04       | 1.66        |
| $SISO_6^5$  | $(VEC/Chg_{Product})/IPDOS_{Product}$                          | 0.14       | 1.37        |
| $SISO_6^6$  | $EN + VEC/Derform$                                             | 0.15       | 16.47       |
| $SISO_7^1$  | $(MM * FIE)/Chg_{Reactant - Product}$                          | -1.00      | 435550.30   |
| $SISO_7^2$  | $EA/AN - VEC$                                                  | 0.03       | 95.92       |
| $SISO_7^3$  | $Chg_{Product} + Chg_{Reactant}/IPDOS_{Product}$               | -0.01      | 1.59        |

|             |                                                         |       |      |
|-------------|---------------------------------------------------------|-------|------|
| $SISSO_7^4$ | $Chg_{Product} + Chg_{Product}/IPDOS_{Reactant}$        | 0.04  | 1.66 |
| $SISSO_7^5$ | $Derform/(Chg_{Reactant} + IPDOS_{Reactant - Product})$ | -0.13 | 2.11 |
| $SISSO_7^6$ | $E_{ad}^{reactant}$                                     | -0.66 | 4.95 |
| $SISSO_7^7$ | $AN$                                                    | 0.05  | 5.03 |

---

Table S9. Reaction energy summary for hydrogenation reactions where H adatom attacks carbon on the surface of Cu-based bimetallic alloys.

| Model | Elementary reaction                                                       | Reaction energy |
|-------|---------------------------------------------------------------------------|-----------------|
| Cu-Au | $(\text{CO}_2 + \text{H})^* \rightarrow \text{bi-HCOO}^*$                 | -0.62           |
|       | $(\text{bi-HCOO} + \text{H})^* \rightarrow \text{bi-H}_2\text{COO}^*$     | -0.10           |
|       | $(\text{bi-H}_2\text{CO} + \text{H})^* \rightarrow \text{CH}_3\text{O}^*$ | -0.57           |
|       | $(\text{CH}_2\text{OH} + \text{H})^* \rightarrow \text{CH}_3\text{OH}^*$  | -0.96           |
|       | $(\text{CO} + \text{H})^* \rightarrow \text{CHO}^*$                       | 0.47            |
|       | $(\text{CHO} + \text{H})^* \rightarrow \text{bi-H}_2\text{CO}^*$          | -0.38           |
| Cu-Ni | $(\text{CO}_2 + \text{H})^* \rightarrow \text{bi-HCOO}^*$                 | -0.32           |
|       | $(\text{bi-HCOO} + \text{H})^* \rightarrow \text{bi-H}_2\text{COO}^*$     | -0.53           |
|       | $(\text{bi-H}_2\text{CO} + \text{H})^* \rightarrow \text{CH}_3\text{O}^*$ | 0.10            |
|       | $(\text{CH}_2\text{OH} + \text{H})^* \rightarrow \text{CH}_3\text{OH}^*$  | -0.04           |
|       | $(\text{CO} + \text{H})^* \rightarrow \text{CHO}^*$                       | 0.92            |
|       | $(\text{CHO} + \text{H})^* \rightarrow \text{bi-H}_2\text{CO}^*$          | 0.83            |
| Cu-Pd | $(\text{CO}_2 + \text{H})^* \rightarrow \text{bi-HCOO}^*$                 | -0.52           |
|       | $(\text{bi-HCOO} + \text{H})^* \rightarrow \text{bi-H}_2\text{COO}^*$     | -0.38           |
|       | $(\text{bi-H}_2\text{CO} + \text{H})^* \rightarrow \text{CH}_3\text{O}^*$ | -0.09           |
|       | $(\text{CH}_2\text{OH} + \text{H})^* \rightarrow \text{CH}_3\text{OH}^*$  | -0.27           |
|       | $(\text{CO} + \text{H})^* \rightarrow \text{CHO}^*$                       | 0.91            |
|       | $(\text{CHO} + \text{H})^* \rightarrow \text{bi-H}_2\text{CO}^*$          | -0.16           |
| Cu-Pt | $(\text{CO}_2 + \text{H})^* \rightarrow \text{bi-HCOO}^*$                 | -0.11           |
|       | $(\text{bi-HCOO} + \text{H})^* \rightarrow \text{bi-H}_2\text{COO}^*$     | -0.62           |
|       | $(\text{bi-H}_2\text{CO} + \text{H})^* \rightarrow \text{CH}_3\text{O}^*$ | -0.41           |
|       | $(\text{CH}_2\text{OH} + \text{H})^* \rightarrow \text{CH}_3\text{OH}^*$  | 0.35            |



|       |                                                                           |       |
|-------|---------------------------------------------------------------------------|-------|
|       | $(\text{CO} + \text{H})^* \rightarrow \text{CHO}^*$                       | 1.22  |
|       | $(\text{CHO} + \text{H})^* \rightarrow \text{bi-H}_2\text{CO}^*$          | 0.27  |
|       | $(\text{CO}_2 + \text{H})^* \rightarrow \text{bi-HCOO}^*$                 | -0.97 |
|       | $(\text{bi-HCOO} + \text{H})^* \rightarrow \text{bi-H}_2\text{COO}^*$     | -0.14 |
| Cu-Zn | $(\text{bi-H}_2\text{CO} + \text{H})^* \rightarrow \text{CH}_3\text{O}^*$ | -1.04 |
|       | $(\text{CH}_2\text{OH} + \text{H})^* \rightarrow \text{CH}_3\text{OH}^*$  | -0.82 |
|       | $(\text{CO} + \text{H})^* \rightarrow \text{CHO}^*$                       | 0.32  |
|       | $(\text{CHO} + \text{H})^* \rightarrow \text{bi-H}_2\text{CO}^*$          | -0.34 |
